# Supplementary material for: Synthesis of novel AgI/BiOI nanocomposites and their high-efficiency visible-light-driven photocatalytic degradation performance for norfloxacin
Source: Royal Society of Chemistry journal article supplement (doi:10.1039/d3nj05037h), 2023-12-01
Supplement: d3nj05037h1.pdf [file d3nj05037h1.pdf]

## **Supporting Information**

### **Synthesis of a novel AgI/BiOI nanocomposites and their high-efficiency visible-light driven photocatalytic degradation performance for norfloxacin**

Xiaomeng Liu, Yitian Zhong, Haosheng Feng, Yanxi Zhao, Qin Li, Tao Huang\*

*Key Laboratory of Catalysis and Energy Materials Chemistry of Ministry of  
Education, College of Chemistry and Materials Science, South-central Minzu  
University, Wuhan 430074, China*

\*Correspondence E-mail: [huangt208@163.com](mailto:huangt208@163.com)

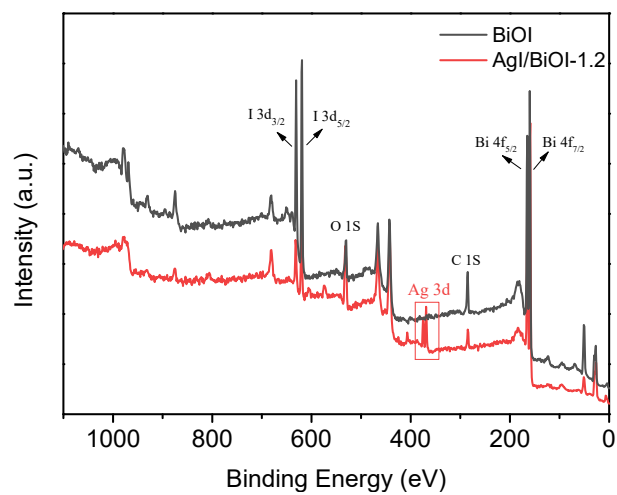

**Figure S1.** The full-scale XPS spectra of AgI/BiOI-1.2 and BiOI samples

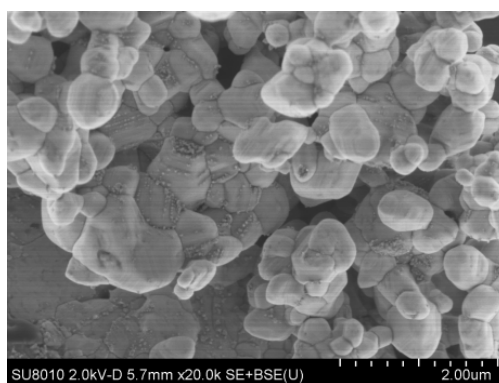

**Figure S2.** SEM image of AgI sample.

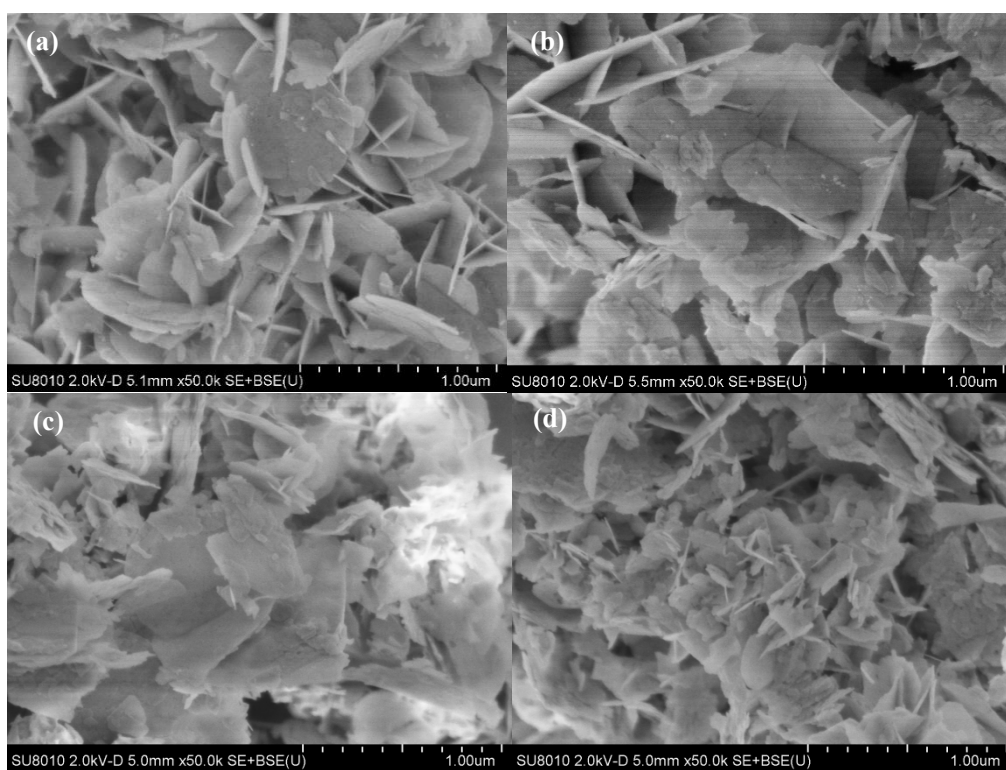

**Figure S3.** SEM images of AgI/BiOI composites with different Ag/Bi molar ratios. (a) 0.8; (b)1; (c)1.4; (d)1.6.

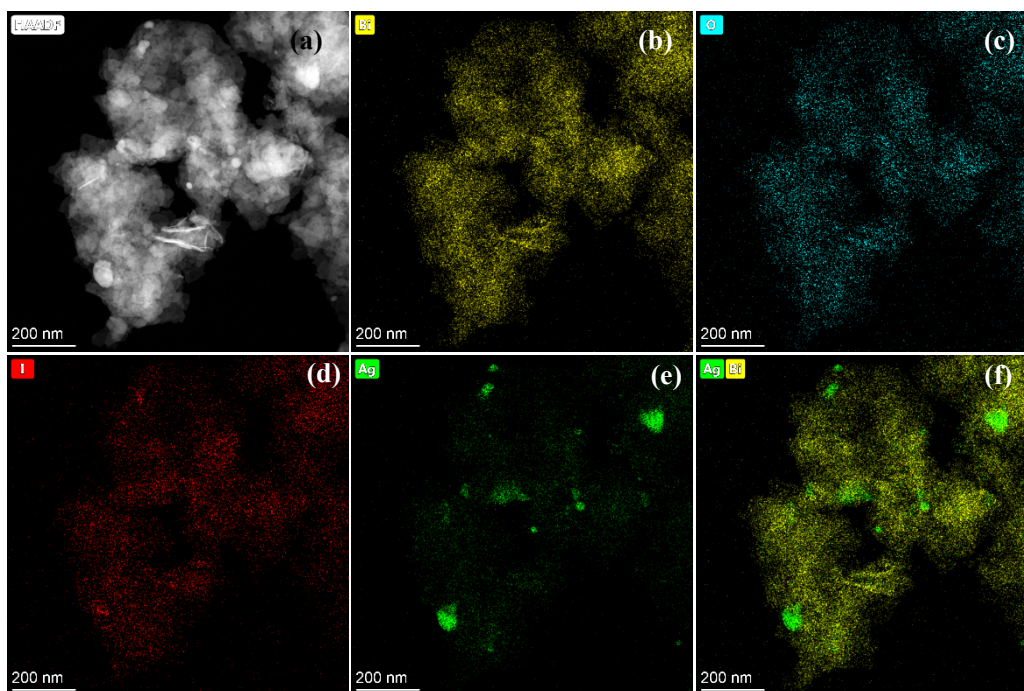

**Figure S4.** HAADF-STEM (a) and corresponding EDS mapping images of AgI/BiOI-1.2 sample (b: yellow=Bi; c: blue=O; d: red=I; e: green=Ag; f: overlap of Bi+Ag).

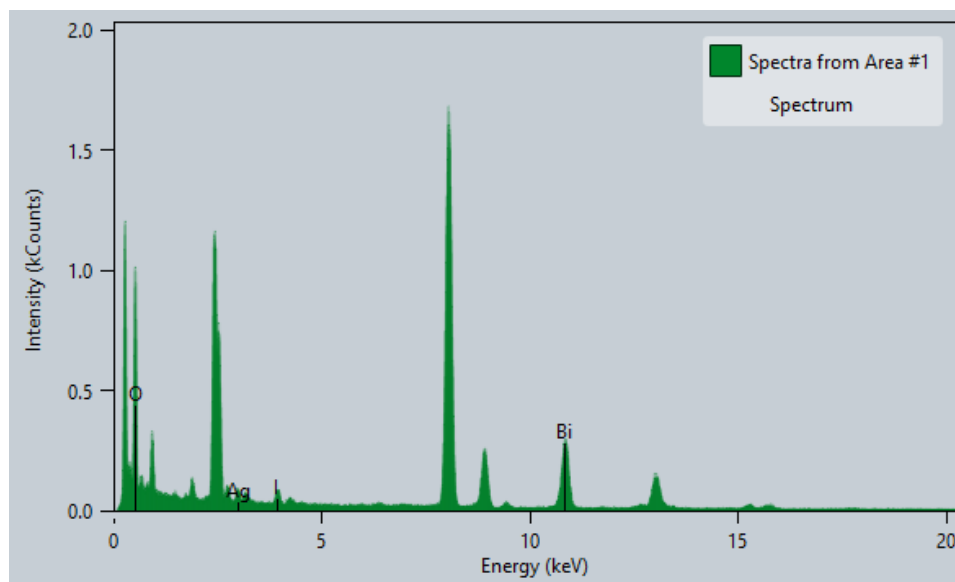

**Figure S5.** EDS spectrum of AgI/BiOI-1.2 sample.

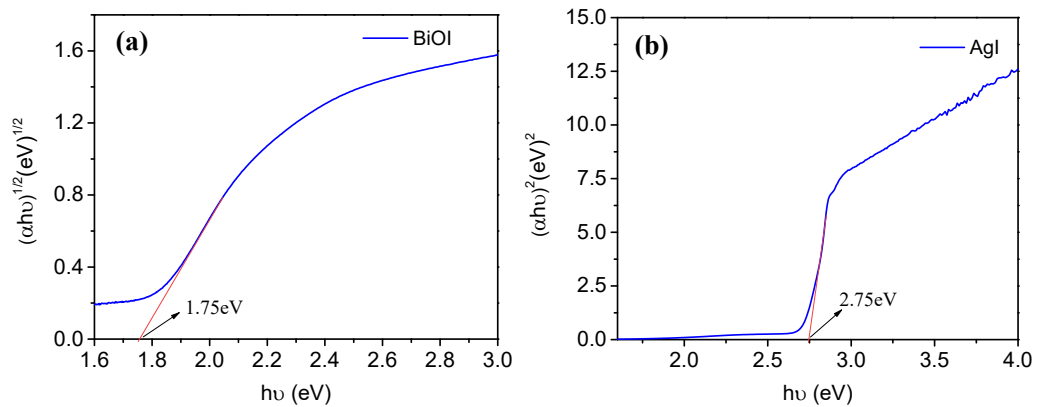

**Figure S6.**  $(\alpha h\nu)^{1/2} \sim h\nu$  plot of BiOI (a) and  $(\alpha h\nu)^2 \sim h\nu$  plot of AgI (b).

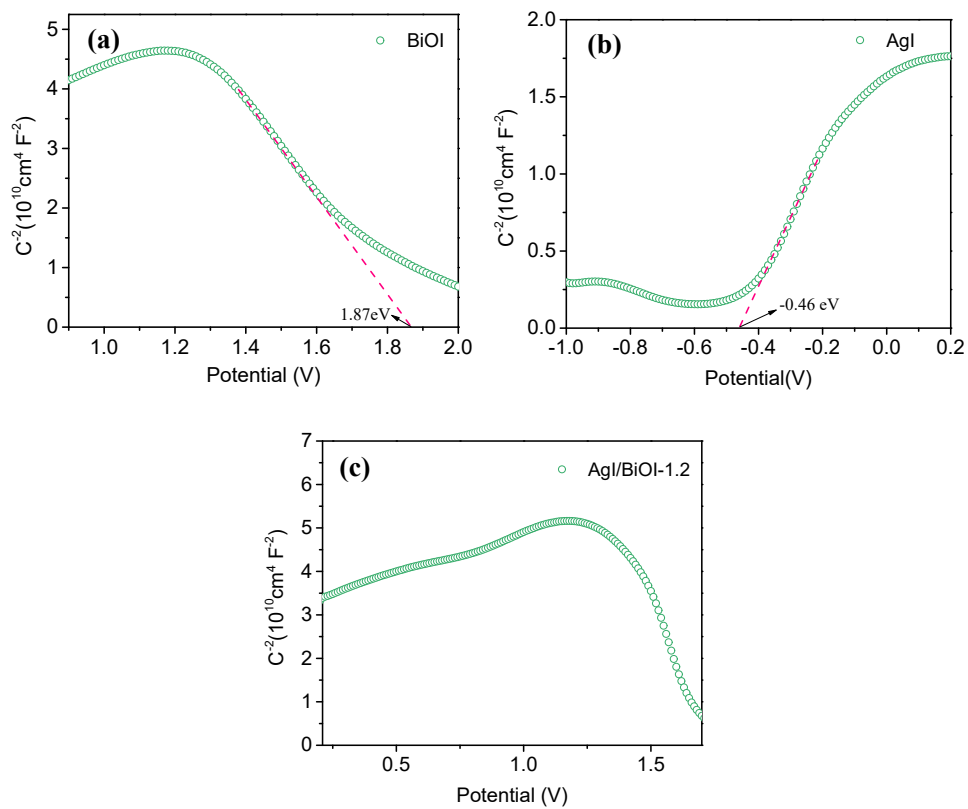

**Figure S7.** Mott-Schottky plots of BiOI (a), AgI (b) and AgI/BiOI-1.2 (c), respectively.

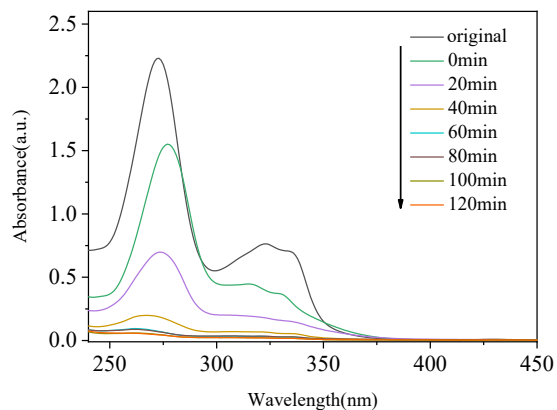

**Figure S8.** UV-vis adsorption spectra of NOR in photocatalytic degradation process in 120 min over AgI/BiOI-1.2

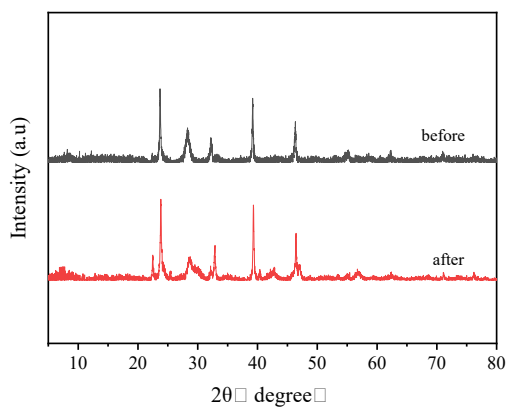

**Figure S9.** XRD comparison before and after four cycles for AgI/BiOI-1.2

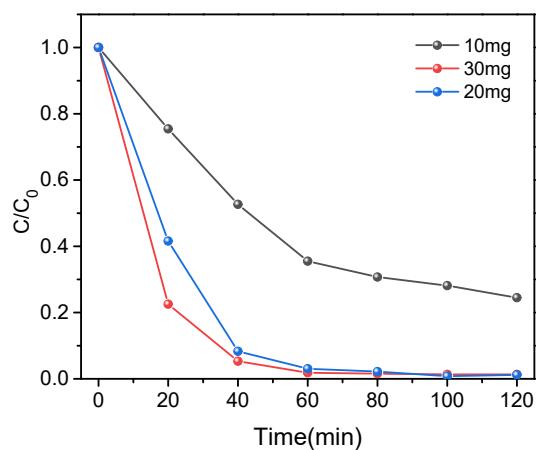

**Fig. S10.** Effect of AgI/BiOI-1.2 dosage on degradation rate of NOR

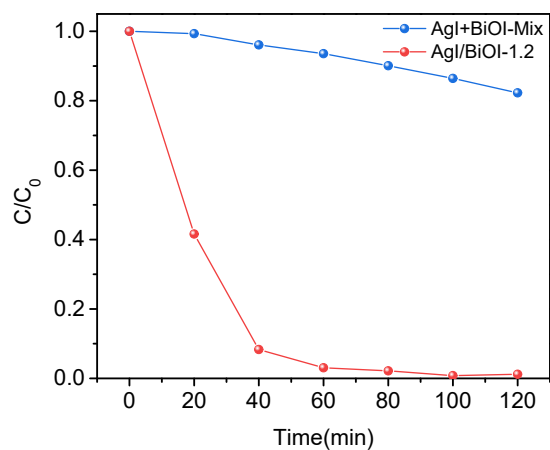

**Figure S11.** Effect of simply mixed sample on degradation rate of NOR

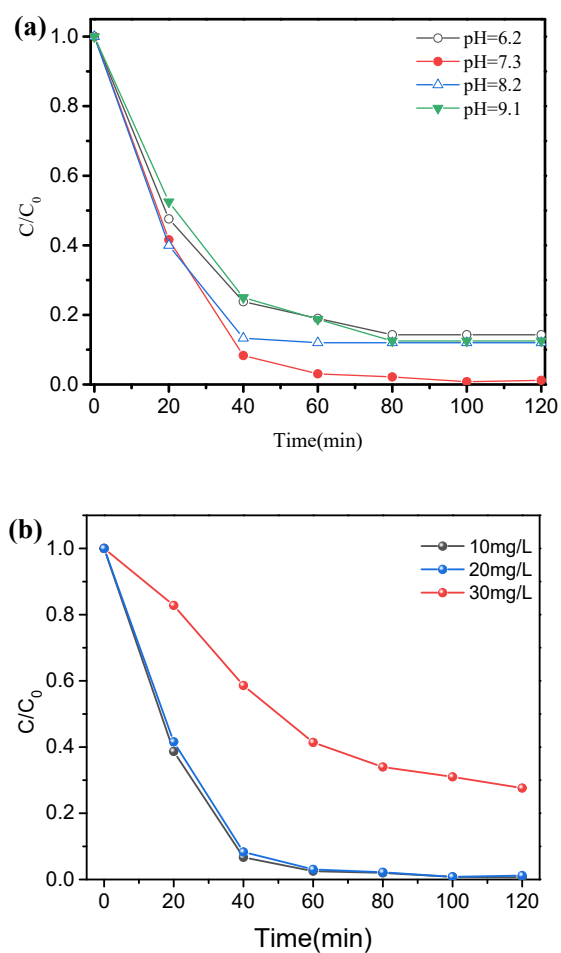

**Figure S12.** The degradation rate of NOR over AgI/BiOI-1.2 samples with different initial pH values (a) and different initial NOR concentrations (b).

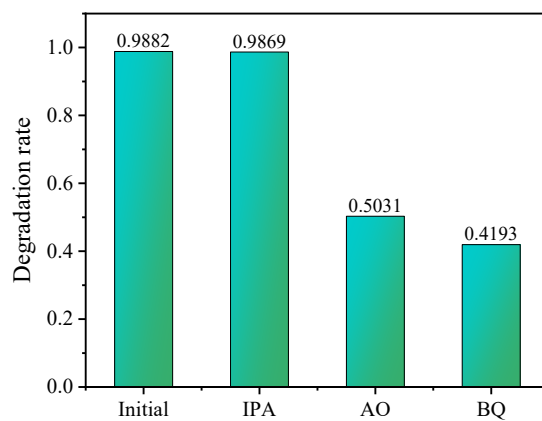

**Figure S13.** The degradation rate of NOR over AgI/BiOI-1.2 samples with different quenchers.



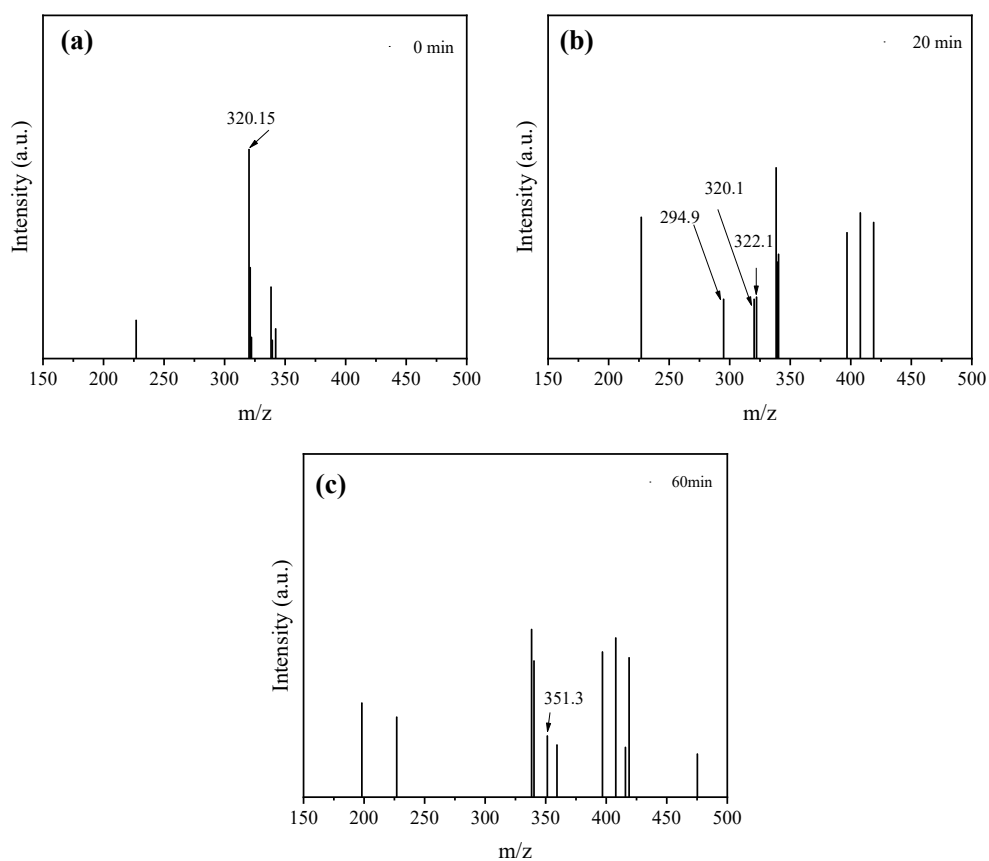

**Figure S14.** HPLC-MS spectrograms for the intermediate products at different degradation time.

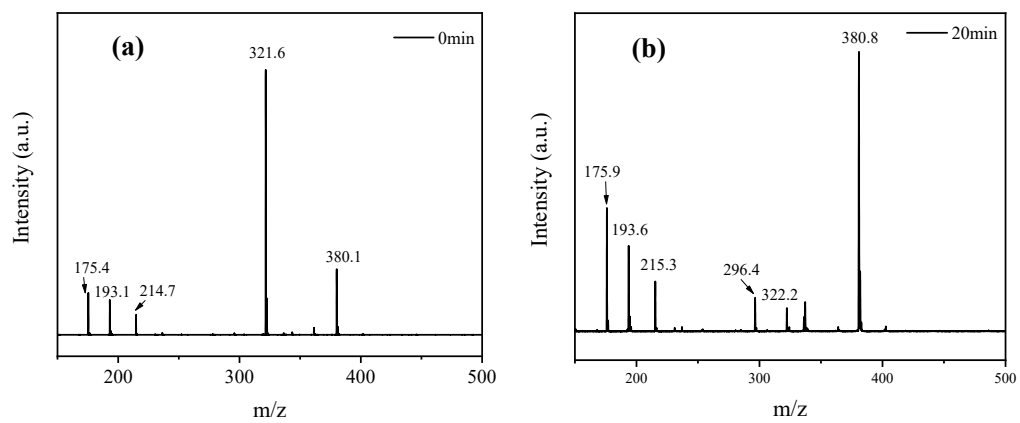

**Figure S15.** MALDI-TOF-MS spectrograms for the intermediate products in 20-min degradation.

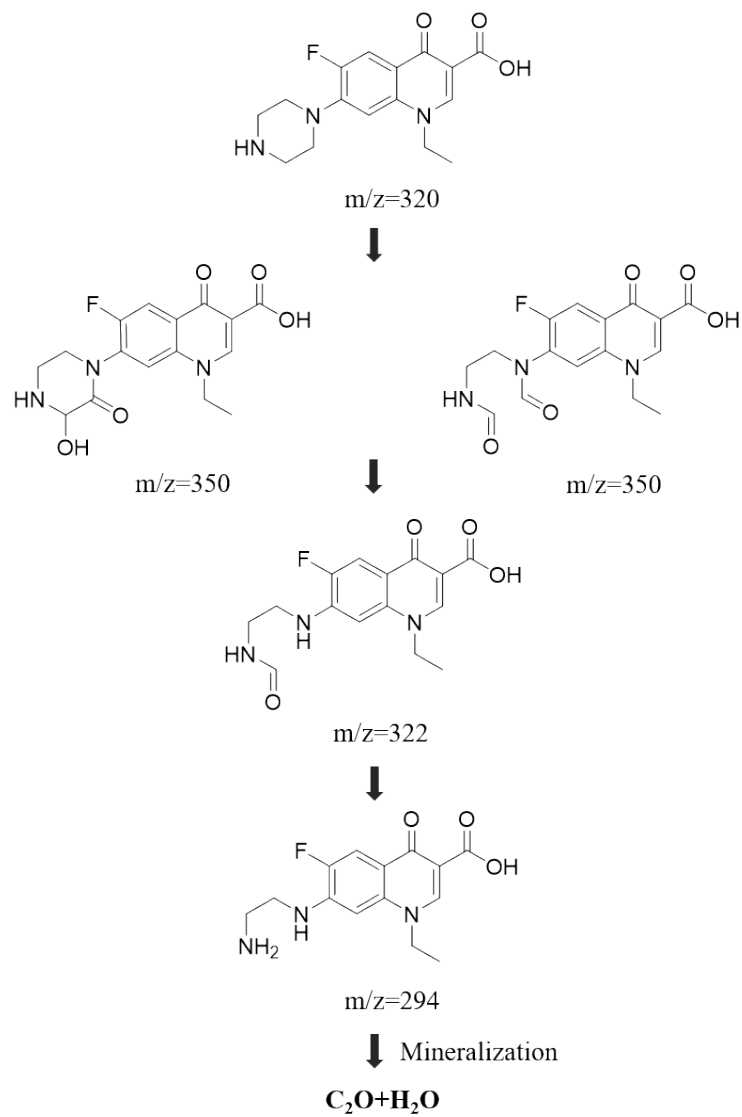

**Figure S16.** NOR photodegradation pathway under simulated sunlight.
